# Supplementary material for: Efficacy of oral afoxolaner for the treatment of canine generalised demodicosis
Source: PubMed Central journal article supplement (PMC4807374; doi:10.1051/parasite/2016014), 2016-03-24
Supplement: parasite-23-14-s1.pdf [file parasite-23-14-s1.pdf]

**PHOTOGRAPHIC DOCUMENTATION**

|                  |                 |
|------------------|-----------------|
| <b>Animal ID</b> | <b>5D1 C97</b>  |
| <b>Treatment</b> | <b>NexGard®</b> |

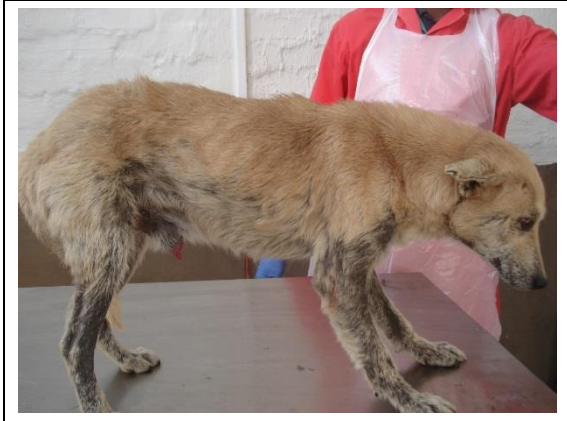

|                   |                      |
|-------------------|----------------------|
| <b>Day</b>        | <b>Pre-treatment</b> |
| <b>Mite count</b> | <b>1741</b>          |

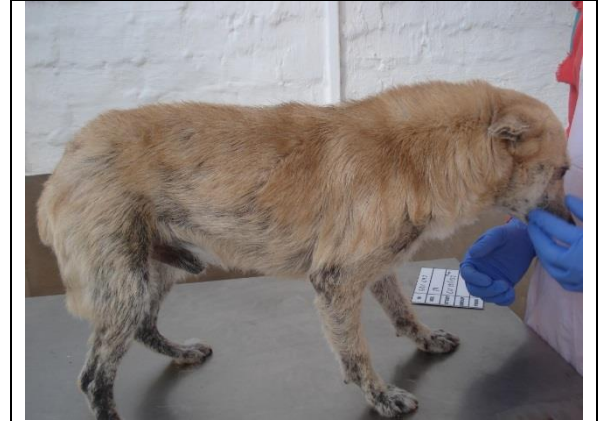

|                   |           |
|-------------------|-----------|
| <b>Day</b>        | <b>28</b> |
| <b>Mite count</b> | <b>1</b>  |

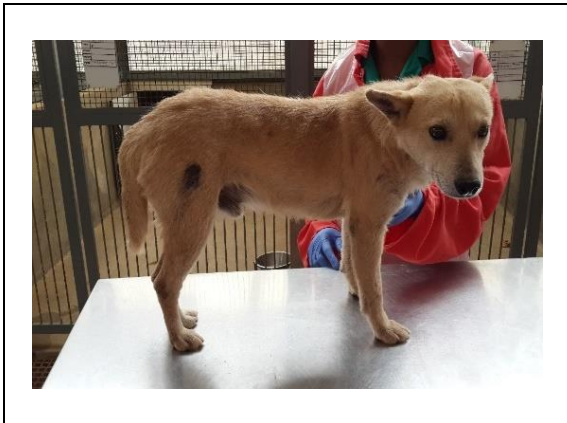

|                   |           |
|-------------------|-----------|
| <b>Day</b>        | <b>56</b> |
| <b>Mite count</b> | <b>0</b>  |

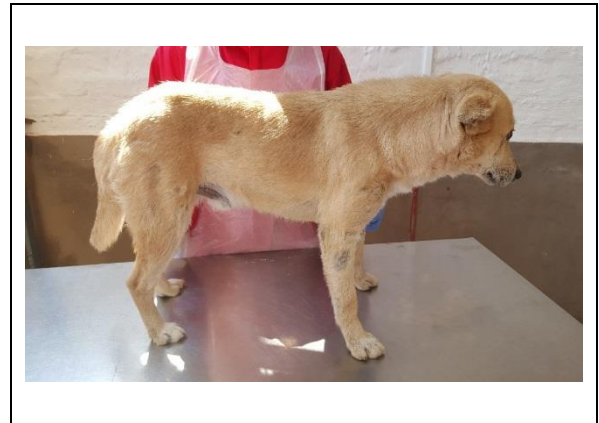

|                   |           |
|-------------------|-----------|
| <b>Day</b>        | <b>84</b> |
| <b>Mite count</b> | <b>0</b>  |

**PHOTOGRAPHIC DOCUMENTATION**

|                  |                 |
|------------------|-----------------|
| <b>Animal ID</b> | <b>5C8 2AA</b>  |
| <b>Treatment</b> | <b>NexGard®</b> |

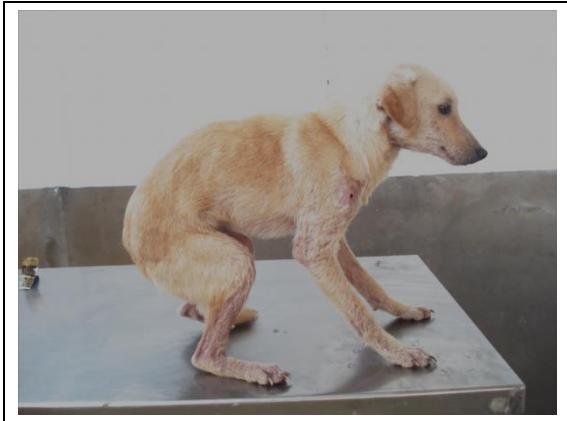

|                   |                      |
|-------------------|----------------------|
| <b>Day</b>        | <b>Pre-treatment</b> |
| <b>Mite count</b> | <b>4637</b>          |

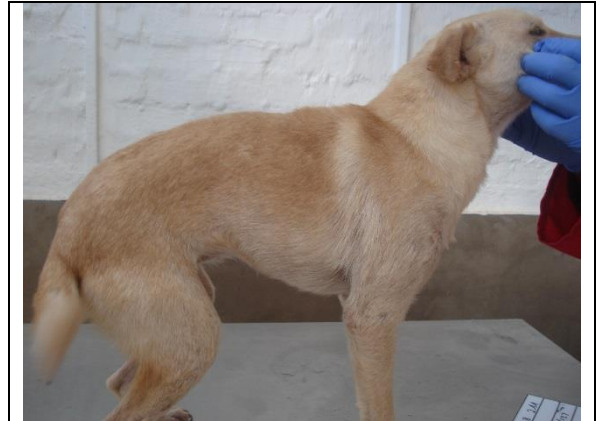

|                   |           |
|-------------------|-----------|
| <b>Day</b>        | <b>28</b> |
| <b>Mite count</b> | <b>15</b> |

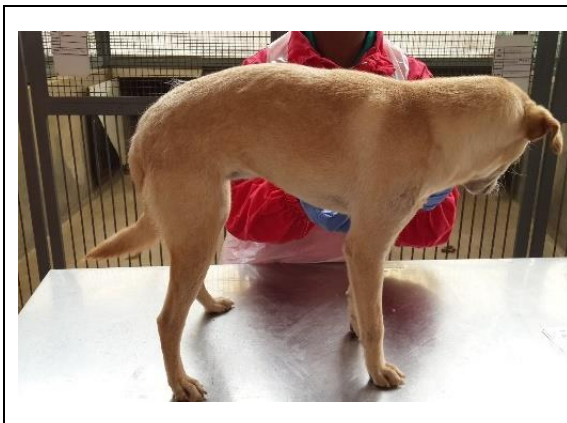

|                   |           |
|-------------------|-----------|
| <b>Day</b>        | <b>56</b> |
| <b>Mite count</b> | <b>0</b>  |

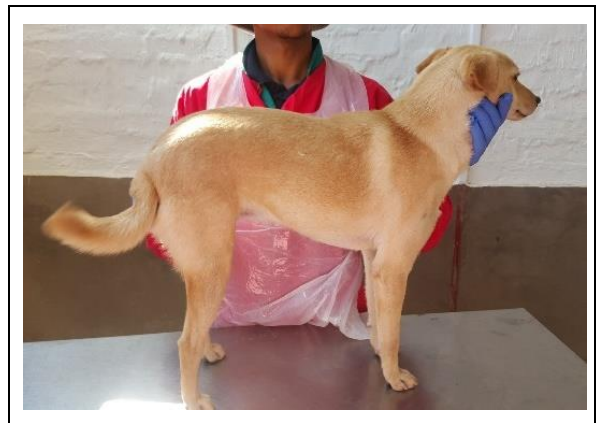

|                   |           |
|-------------------|-----------|
| <b>Day</b>        | <b>84</b> |
| <b>Mite count</b> | <b>0</b>  |

**PHOTOGRAPHIC DOCUMENTATION**

|                  |                 |
|------------------|-----------------|
| <b>Animal ID</b> | <b>698 376</b>  |
| <b>Treatment</b> | <b>NexGard®</b> |

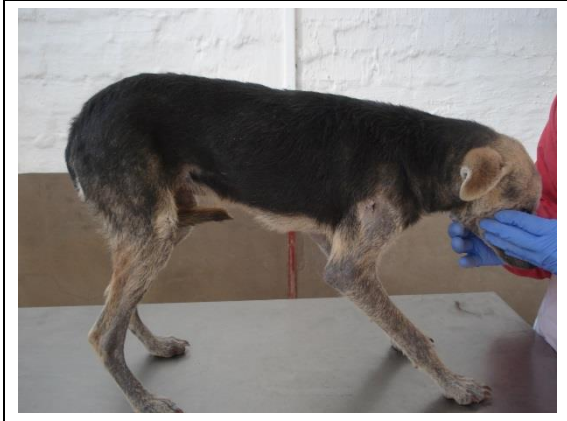

|            |               |
|------------|---------------|
| Day        | Pre-treatment |
| Mite count | 203           |

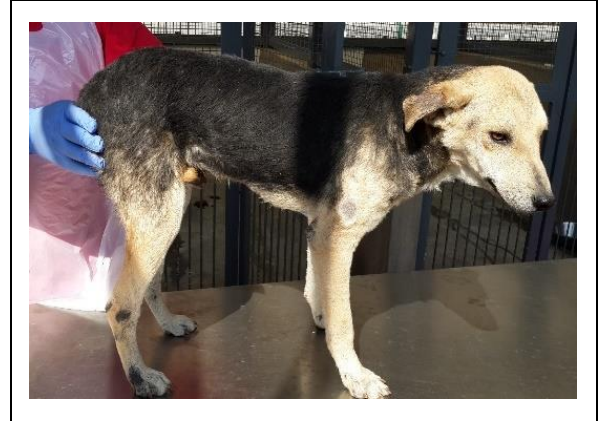

|            |    |
|------------|----|
| Day        | 28 |
| Mite count | 0  |

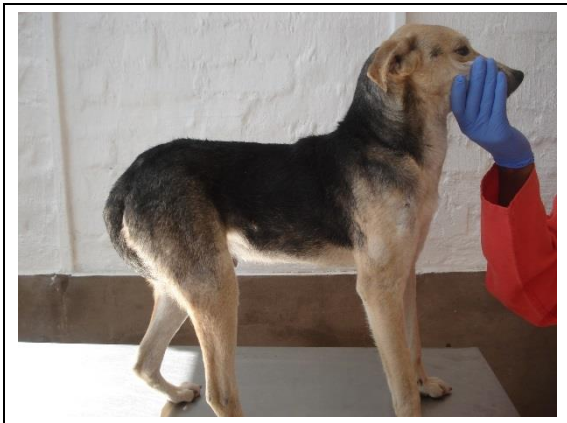

|            |    |
|------------|----|
| Day        | 56 |
| Mite count | 0  |

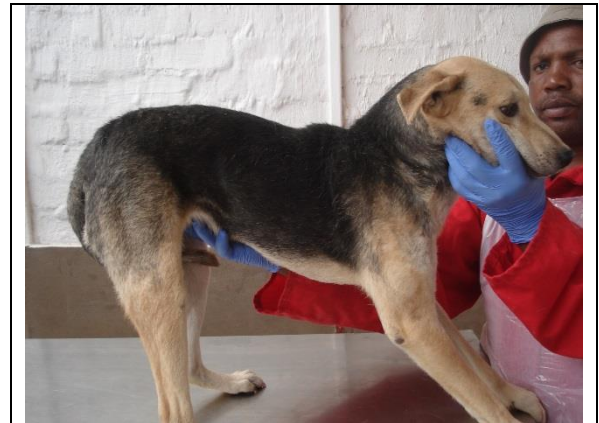

|            |    |
|------------|----|
| Day        | 84 |
| Mite count | 0  |

**PHOTOGRAPHIC DOCUMENTATION**

|                  |                 |
|------------------|-----------------|
| <b>Animal ID</b> | <b>698 38D</b>  |
| <b>Treatment</b> | <b>NexGard®</b> |

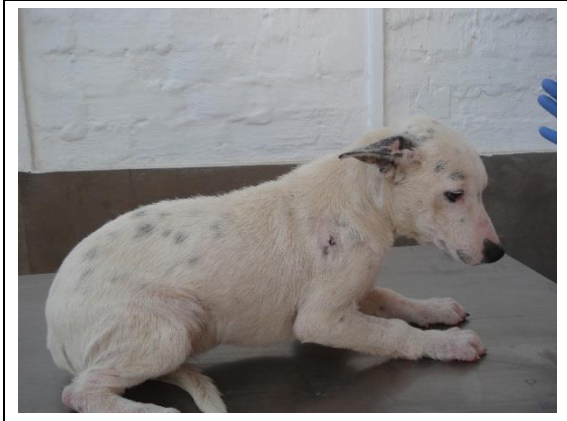

|                   |                      |
|-------------------|----------------------|
| <b>Day</b>        | <b>Pre-treatment</b> |
| <b>Mite count</b> | <b>8</b>             |

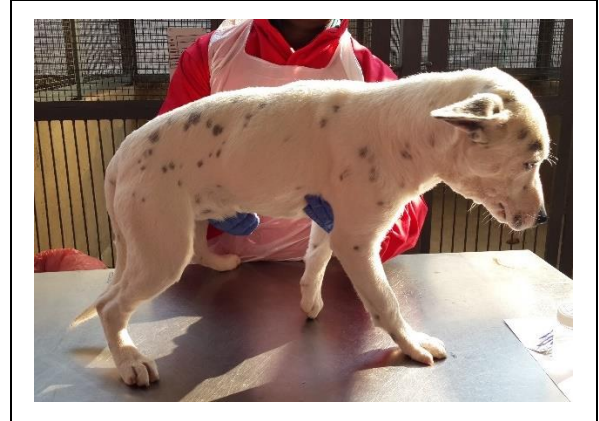

|                   |           |
|-------------------|-----------|
| <b>Day</b>        | <b>28</b> |
| <b>Mite count</b> | <b>0</b>  |

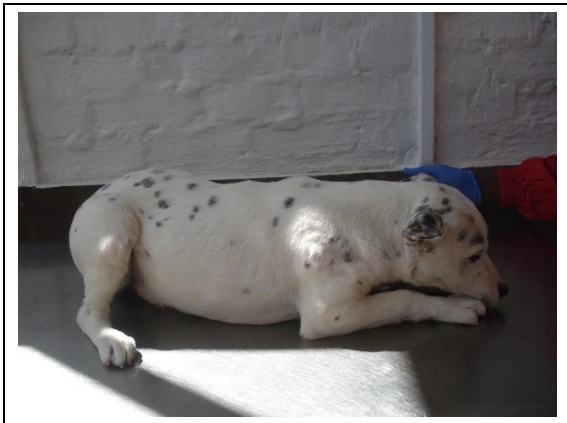

|                   |           |
|-------------------|-----------|
| <b>Day</b>        | <b>56</b> |
| <b>Mite count</b> | <b>1</b>  |

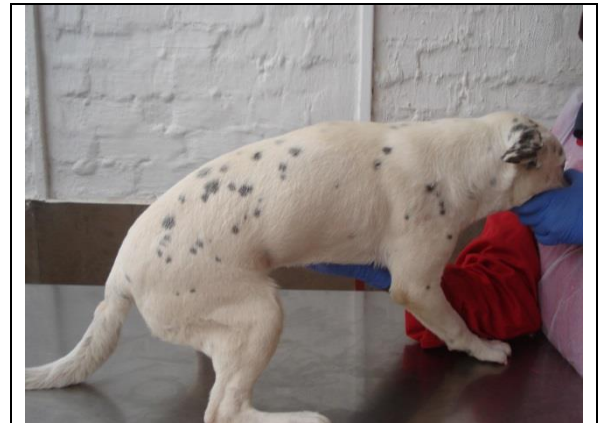

|                   |           |
|-------------------|-----------|
| <b>Day</b>        | <b>84</b> |
| <b>Mite count</b> | <b>0</b>  |

**PHOTOGRAPHIC DOCUMENTATION**

|                  |                 |
|------------------|-----------------|
| <b>Animal ID</b> | <b>698 OFF</b>  |
| <b>Treatment</b> | <b>NexGard®</b> |

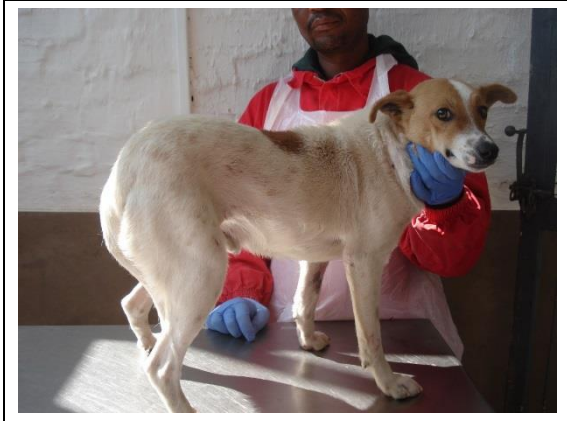

|                   |                      |
|-------------------|----------------------|
| <b>Day</b>        | <b>Pre-treatment</b> |
| <b>Mite count</b> | <b>566</b>           |

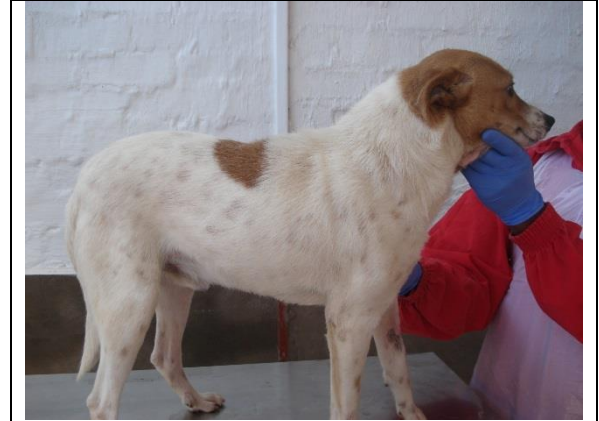

|                   |           |
|-------------------|-----------|
| <b>Day</b>        | <b>28</b> |
| <b>Mite count</b> | <b>19</b> |

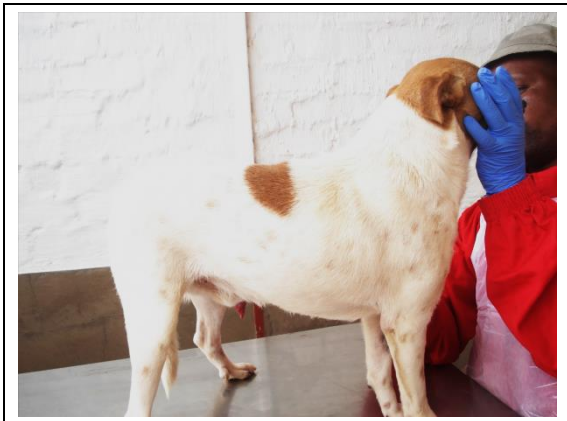

|                   |           |
|-------------------|-----------|
| <b>Day</b>        | <b>56</b> |
| <b>Mite count</b> | <b>0</b>  |

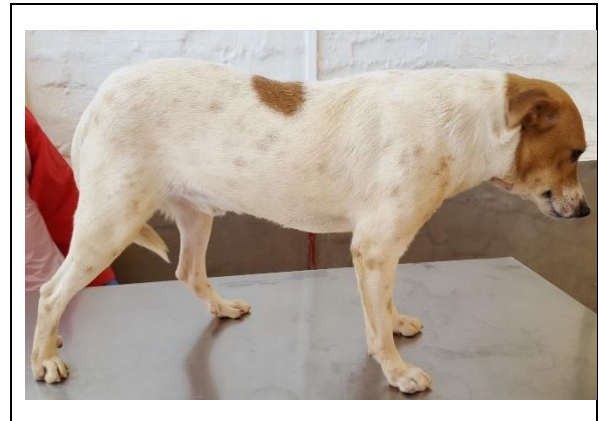

|                   |           |
|-------------------|-----------|
| <b>Day</b>        | <b>84</b> |
| <b>Mite count</b> | <b>0</b>  |

**PHOTOGRAPHIC DOCUMENTATION**

|                  |                 |
|------------------|-----------------|
| <b>Animal ID</b> | <b>5A8 C5A</b>  |
| <b>Treatment</b> | <b>NexGard®</b> |

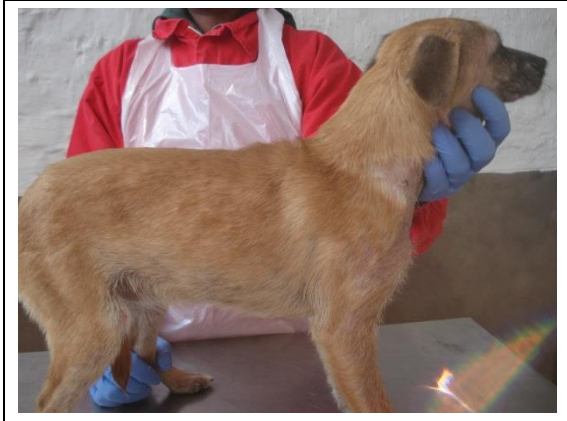

|                   |                      |
|-------------------|----------------------|
| <b>Day</b>        | <b>Pre-treatment</b> |
| <b>Mite count</b> | <b>3121</b>          |

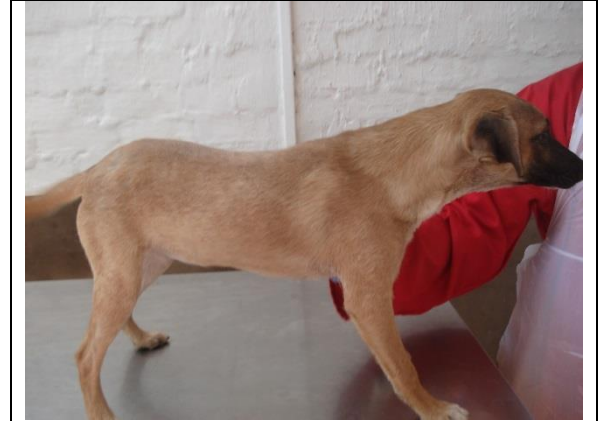

|                   |            |
|-------------------|------------|
| <b>Day</b>        | <b>28</b>  |
| <b>Mite count</b> | <b>152</b> |

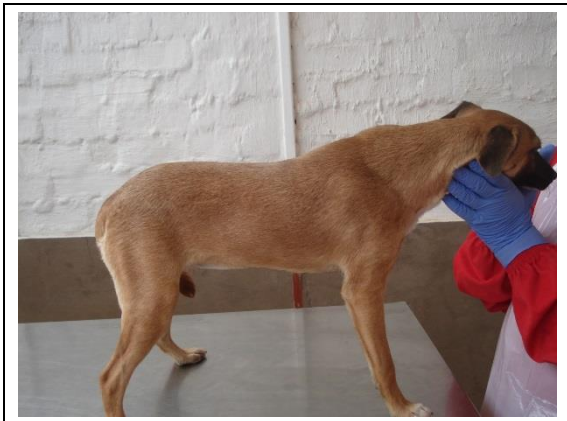

|                   |           |
|-------------------|-----------|
| <b>Day</b>        | <b>56</b> |
| <b>Mite count</b> | <b>23</b> |

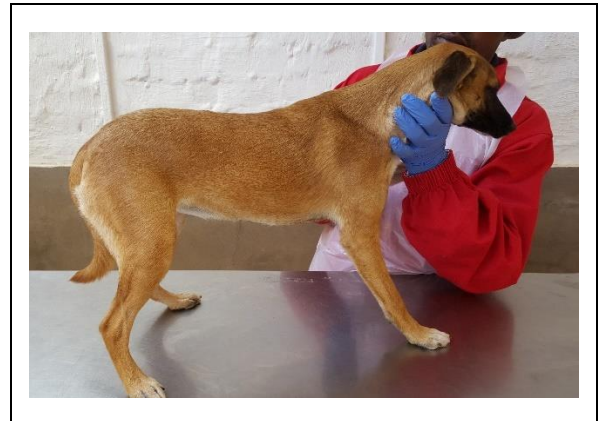

|                   |           |
|-------------------|-----------|
| <b>Day</b>        | <b>84</b> |
| <b>Mite count</b> | <b>0</b>  |

**PHOTOGRAPHIC DOCUMENTATION**

|                  |                 |
|------------------|-----------------|
| <b>Animal ID</b> | <b>6D4 1A0</b>  |
| <b>Treatment</b> | <b>NexGard®</b> |

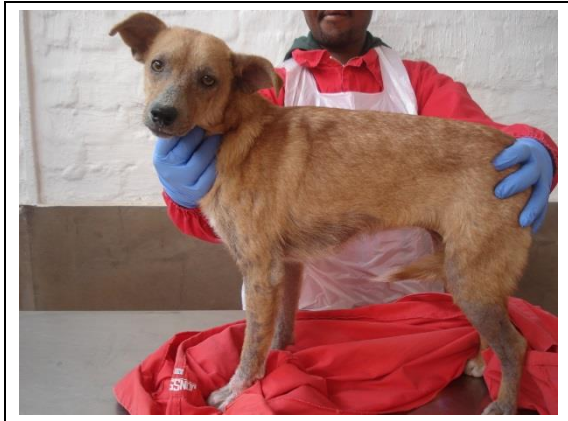

|            |               |
|------------|---------------|
| Day        | Pre-treatment |
| Mite count | 1832          |

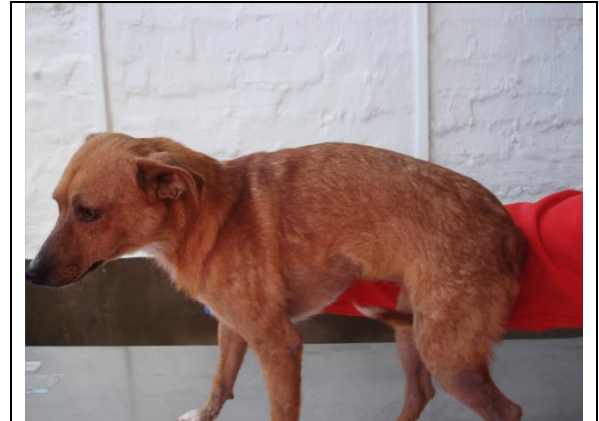

|            |    |
|------------|----|
| Day        | 28 |
| Mite count | 0  |

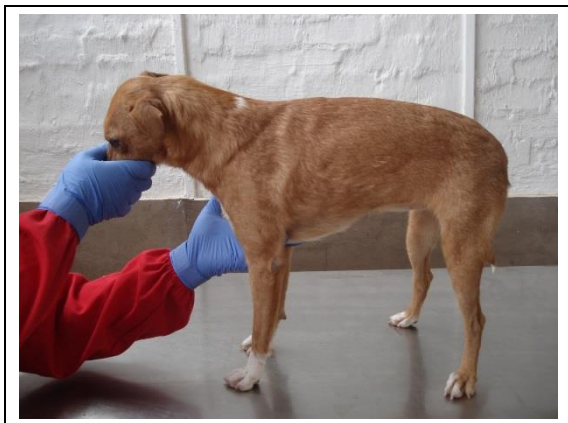

|            |    |
|------------|----|
| Day        | 56 |
| Mite count | 0  |

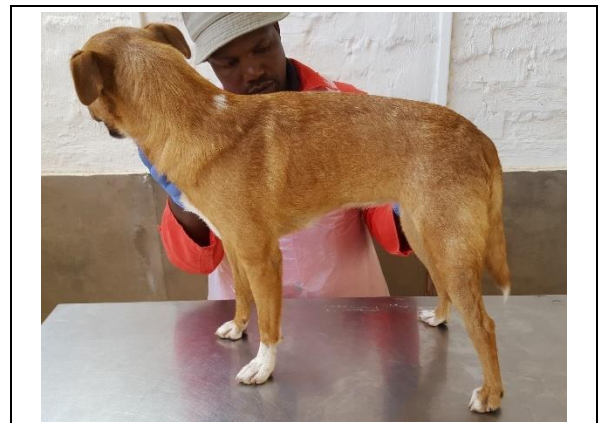

|            |    |
|------------|----|
| Day        | 84 |
| Mite count | 0  |

**PHOTOGRAPHIC DOCUMENTATION**

|                  |                 |
|------------------|-----------------|
| <b>Animal ID</b> | <b>57B 205*</b> |
| <b>Treatment</b> | <b>NexGard®</b> |

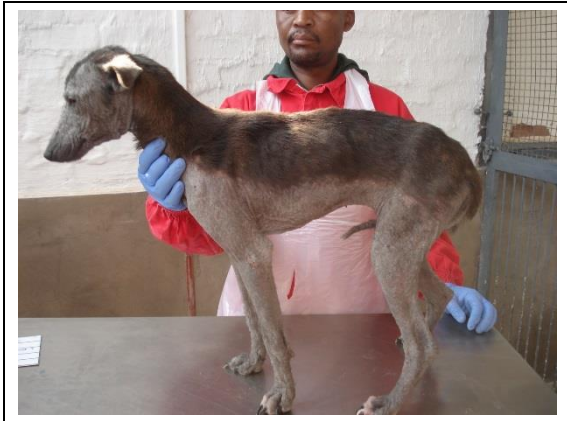

|            |               |
|------------|---------------|
| Day        | Pre-treatment |
| Mite count | 676           |

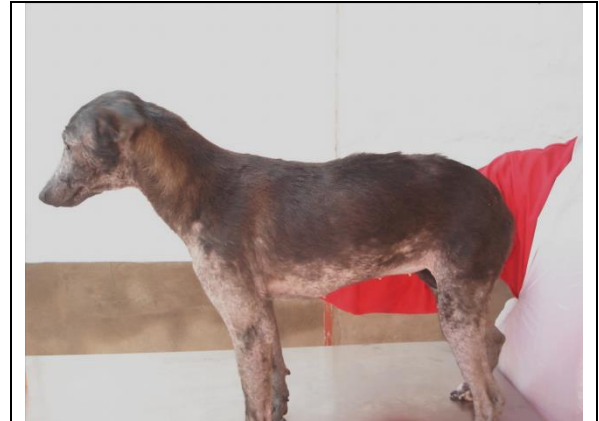

|            |    |
|------------|----|
| Day        | 28 |
| Mite count | 25 |

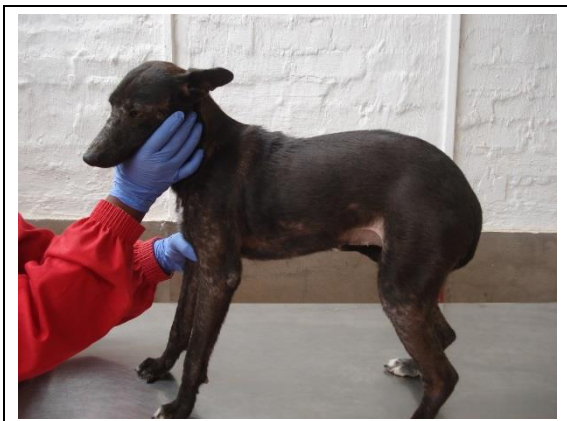

|            |    |
|------------|----|
| Day        | 56 |
| Mite count | 0  |

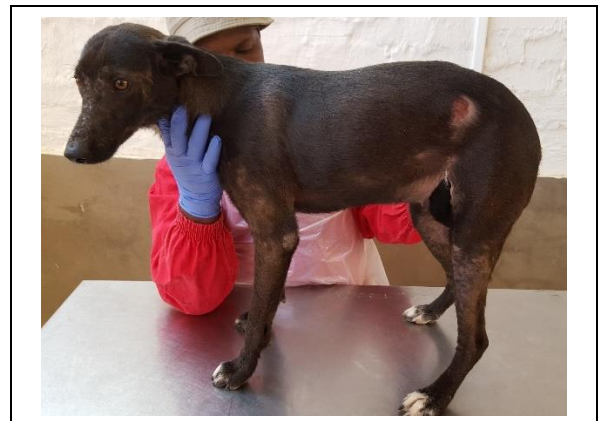

|            |    |
|------------|----|
| Day        | 84 |
| Mite count | 0  |

\* This particular case shows slow clinical recovery, illustrating that some dogs may need longer clinical follow-up and treatment duration (e.g. 3 months or more).
